# Supplementary material for: Efficacy and Health-Related Quality of Life Impact of Fecal Microbiota, Live-jslm: A Post Hoc Analysis of PUNCH CD3 Patients at First Recurrence of Clostridioides difficile Infection
Source: Springer Nature journal article supplement (doi:10.1007/s40121-023-00907-w), 2024-01-01
Supplement: MOESM1 [file 26639754]

**Efficacy and Health-related Quality of Life Impact of Fecal microbiota, live-  
jslm: A Post-hoc Analysis of PUNCH CD3 Patients at First Recurrence of  
*Clostridioides difficile* Infection**

**Supplementary Material**

**Authors:** Paul Feuerstadt, MD<sup>1,2</sup>, Jessica R. Allegretti, MD, MPH<sup>3</sup>, Erik R Dubberke, MD, MSPH<sup>4</sup>, Amy Guo, PhD<sup>5</sup>, Adam Harvey, PhD<sup>6</sup>, Min Yang, MD, PhD<sup>7,8</sup>, Viviana Garcia-Horton, PhD<sup>9</sup>, Mirko Fillbrunn, PhD<sup>7</sup>, Glenn Tillotson, PhD<sup>10</sup>, Lindy L Bancke, PharmD<sup>6</sup>, Kerry LaPlante, PharmD<sup>11,12</sup>, Kevin W Garey, PharmD, MS<sup>13</sup>, Sahil Khanna, MBBS, MS<sup>14</sup>

**Affiliations:**

<sup>1</sup> Yale University School of Medicine, New Haven, CT, United States

<sup>2</sup> PACT-Gastroenterology Center, New Haven, CT, United States

<sup>3</sup> Brigham and Women's Hospital, Boston, MA, United States

<sup>4</sup> Washington University, St Louis, MO, United States

<sup>5</sup> Ferring Pharmaceuticals, Inc., Parsippany, NJ, United States

<sup>6</sup> Rebiotix, a Ferring Company, Roseville, MN, United States.

<sup>7</sup> Analysis Group, Inc., Boston, MA, United States

<sup>8</sup> University of Texas at Austin, Austin, TX, United States

<sup>9</sup> Analysis Group, Inc., New York, NY, United States

<sup>10</sup> GST Micro LLC, North, VA, United States

<sup>11</sup> University of Rhode Island, Kingston, RI, United States

<sup>12</sup> Warren Alpert Medical School of Brown University, Providence, RI, United States

<sup>13</sup> University of Houston, Houston, TX, United States

<sup>14</sup> Mayo Clinic, Rochester, MN, United States

**Corresponding Author:** Paul Feuerstadt

Address: 2200 Whitney Avenue Suite 330 & 360, Hamden, CT,

United States, 06518

Phone: 203-281-4463

Email: [pfeuerstadt@gastrocenter.org](mailto:pfeuerstadt@gastrocenter.org)

**HEALTH-RELATED QUALITY OF LIFE QUESTIONNAIRE FOR *CLOSTRIDIUM DIFFICILE* INFECTION (*C. diff* infection)**

How to fill the questionnaire

The following questions are about your state of health over the last 7 days. Each question has five different responses. For each statement, please circle or check the corresponding box for the response that best describes your feelings. Please respond to all questions even if you think some are similar. Please do not leave any question unanswered. If you make a mistake, cross out the wrong answer and circle or check the corresponding box for the one that best applies to you. Thank you for your participation.

**DAILY ACTIVITIES**

**Over the last 7 days, because of your *C. diff* infection,**

1. Have you had any difficulties and/or disruption carrying out your daily activities?

- |                                       |                                       |                                       |                                       |                                       |
|---------------------------------------|---------------------------------------|---------------------------------------|---------------------------------------|---------------------------------------|
| <input type="checkbox"/> <sub>1</sub> | <input type="checkbox"/> <sub>2</sub> | <input type="checkbox"/> <sub>3</sub> | <input type="checkbox"/> <sub>4</sub> | <input type="checkbox"/> <sub>5</sub> |
| Not at all                            | A little bit                          | Moderately                            | Quite a bit                           | Extremely                             |

2. Have you had any difficulties carrying out your leisure activities like gardening, walking, etc?

- |                                       |                                       |                                       |                                       |                                       |
|---------------------------------------|---------------------------------------|---------------------------------------|---------------------------------------|---------------------------------------|
| <input type="checkbox"/> <sub>1</sub> | <input type="checkbox"/> <sub>2</sub> | <input type="checkbox"/> <sub>3</sub> | <input type="checkbox"/> <sub>4</sub> | <input type="checkbox"/> <sub>5</sub> |
| Not at all                            | A little bit                          | Moderately                            | Quite a bit                           | Extremely                             |

3. Has it taken you longer to perform certain tasks at work (including work in the home)?

- |                                       |                                       |                                       |                                       |                                       |
|---------------------------------------|---------------------------------------|---------------------------------------|---------------------------------------|---------------------------------------|
| <input type="checkbox"/> <sub>1</sub> | <input type="checkbox"/> <sub>2</sub> | <input type="checkbox"/> <sub>3</sub> | <input type="checkbox"/> <sub>4</sub> | <input type="checkbox"/> <sub>5</sub> |
| Not at all                            | A little bit                          | Moderately                            | Quite a bit                           | Extremely                             |

4. Has your *C. diff* infection prevented you from leaving your house?

- |                                       |                                       |                                       |                                       |                                       |
|---------------------------------------|---------------------------------------|---------------------------------------|---------------------------------------|---------------------------------------|
| <input type="checkbox"/> <sub>1</sub> | <input type="checkbox"/> <sub>2</sub> | <input type="checkbox"/> <sub>3</sub> | <input type="checkbox"/> <sub>4</sub> | <input type="checkbox"/> <sub>5</sub> |
| Never                                 | Rarely                                | Sometimes                             | Often                                 | Always                                |

**ANXIETY**

5. Are you afraid that your *C. diff* infection could come back again?

- |                                       |                                       |                                       |                                       |                                       |
|---------------------------------------|---------------------------------------|---------------------------------------|---------------------------------------|---------------------------------------|
| <input type="checkbox"/> <sub>1</sub> | <input type="checkbox"/> <sub>2</sub> | <input type="checkbox"/> <sub>3</sub> | <input type="checkbox"/> <sub>4</sub> | <input type="checkbox"/> <sub>5</sub> |
| Not at all                            | A little bit                          | Moderately                            | Quite a bit                           | Extremely                             |

6. Are you afraid that your *C. diff* infection could get worse in the future?

- |                                       |                                       |                                       |                                       |                                       |
|---------------------------------------|---------------------------------------|---------------------------------------|---------------------------------------|---------------------------------------|
| <input type="checkbox"/> <sub>1</sub> | <input type="checkbox"/> <sub>2</sub> | <input type="checkbox"/> <sub>3</sub> | <input type="checkbox"/> <sub>4</sub> | <input type="checkbox"/> <sub>5</sub> |
| Not at all                            | A little bit                          | Moderately                            | Quite a bit                           | Extremely                             |

7. Are you afraid that the next time you'll need antibiotics, your *C. diff* infection will appear again?

- |                                       |                                       |                                       |                                       |                                       |
|---------------------------------------|---------------------------------------|---------------------------------------|---------------------------------------|---------------------------------------|
| <input type="checkbox"/> <sub>1</sub> | <input type="checkbox"/> <sub>2</sub> | <input type="checkbox"/> <sub>3</sub> | <input type="checkbox"/> <sub>4</sub> | <input type="checkbox"/> <sub>5</sub> |
|---------------------------------------|---------------------------------------|---------------------------------------|---------------------------------------|---------------------------------------|

Not at all      A little bit      Moderately      Quite a bit      Extremely

**Over the last 7 days,**

8. Have you been worried about not knowing when the next diarrhea would arise?

<sub>1</sub>      <sub>2</sub>      <sub>3</sub>      <sub>4</sub>      <sub>5</sub>  
Never      Rarely      Sometimes      Often      Always

**DIET**

9. Are you afraid that certain food will worsen your *C. diff* infection?

<sub>1</sub>      <sub>2</sub>      <sub>3</sub>      <sub>4</sub>      <sub>5</sub>  
Not at all      A little bit      Moderately      Quite a bit      Extremely

**Over the last 7 days, because of your *C. diff* infection,**

10. Have you felt frustrated about what you can eat and when?

<sub>1</sub>      <sub>2</sub>      <sub>3</sub>      <sub>4</sub>      <sub>5</sub>  
Not at all      A little bit      Moderately      Quite a bit      Extremely

**SLEEP**

**Over the last 7 days,**

11. Because of your *C. diff* infection, have you had trouble sleeping?

- |                                       |                                       |                                       |                                       |                                       |
|---------------------------------------|---------------------------------------|---------------------------------------|---------------------------------------|---------------------------------------|
| <input type="checkbox"/> <sub>1</sub> | <input type="checkbox"/> <sub>2</sub> | <input type="checkbox"/> <sub>3</sub> | <input type="checkbox"/> <sub>4</sub> | <input type="checkbox"/> <sub>5</sub> |
| Never                                 | Rarely                                | Sometimes                             | Often                                 | Always                                |

12. Because of your *C. diff* infection have you been woken up from sleep?

- |                                       |                                       |                                       |                                       |                                       |
|---------------------------------------|---------------------------------------|---------------------------------------|---------------------------------------|---------------------------------------|
| <input type="checkbox"/> <sub>1</sub> | <input type="checkbox"/> <sub>2</sub> | <input type="checkbox"/> <sub>3</sub> | <input type="checkbox"/> <sub>4</sub> | <input type="checkbox"/> <sub>5</sub> |
| Never                                 | Rarely                                | Sometimes                             | Often                                 | Always                                |

**DISCOMFORT**

**Over the last 7 days,**

13. Have you been bothered by abdominal pain?

- |                                       |                                       |                                       |                                       |                                       |
|---------------------------------------|---------------------------------------|---------------------------------------|---------------------------------------|---------------------------------------|
| <input type="checkbox"/> <sub>1</sub> | <input type="checkbox"/> <sub>2</sub> | <input type="checkbox"/> <sub>3</sub> | <input type="checkbox"/> <sub>4</sub> | <input type="checkbox"/> <sub>5</sub> |
| Not at all                            | A little bit                          | Moderately                            | Quite a bit                           | Extremely                             |

14. Have you been bothered by flatulence (wind)?

- |                                       |                                       |                                       |                                       |                                       |
|---------------------------------------|---------------------------------------|---------------------------------------|---------------------------------------|---------------------------------------|
| <input type="checkbox"/> <sub>1</sub> | <input type="checkbox"/> <sub>2</sub> | <input type="checkbox"/> <sub>3</sub> | <input type="checkbox"/> <sub>4</sub> | <input type="checkbox"/> <sub>5</sub> |
| Not at all                            | A little bit                          | Moderately                            | Quite a bit                           | Extremely                             |

15. Have you been bothered by a bloated stomach?

- |                                       |                                       |                                       |                                       |                                       |
|---------------------------------------|---------------------------------------|---------------------------------------|---------------------------------------|---------------------------------------|
| <input type="checkbox"/> <sub>1</sub> | <input type="checkbox"/> <sub>2</sub> | <input type="checkbox"/> <sub>3</sub> | <input type="checkbox"/> <sub>4</sub> | <input type="checkbox"/> <sub>5</sub> |
| Not at all                            | A little bit                          | Moderately                            | Quite a bit                           | Extremely                             |

16. Have you avoided wearing some clothes (tight clothes, dress, light-colored clothes ...)?

- |                                       |                                       |                                       |                                       |                                       |
|---------------------------------------|---------------------------------------|---------------------------------------|---------------------------------------|---------------------------------------|
| <input type="checkbox"/> <sub>1</sub> | <input type="checkbox"/> <sub>2</sub> | <input type="checkbox"/> <sub>3</sub> | <input type="checkbox"/> <sub>4</sub> | <input type="checkbox"/> <sub>5</sub> |
| Never                                 | Rarely                                | Sometimes                             | Often                                 | Always                                |

17. Have you been bothered by the smell caused by your *C. diff* infection related diarrhea?

- |                                       |                                       |                                       |                                       |                                       |
|---------------------------------------|---------------------------------------|---------------------------------------|---------------------------------------|---------------------------------------|
| <input type="checkbox"/> <sub>1</sub> | <input type="checkbox"/> <sub>2</sub> | <input type="checkbox"/> <sub>3</sub> | <input type="checkbox"/> <sub>4</sub> | <input type="checkbox"/> <sub>5</sub> |
| Never                                 | Rarely                                | Sometimes                             | Often                                 | Always                                |

18. Have you been bothered by how much time you spend on the toilet?

- |                                       |                                       |                                       |                                       |                                       |
|---------------------------------------|---------------------------------------|---------------------------------------|---------------------------------------|---------------------------------------|
| <input type="checkbox"/> <sub>1</sub> | <input type="checkbox"/> <sub>2</sub> | <input type="checkbox"/> <sub>3</sub> | <input type="checkbox"/> <sub>4</sub> | <input type="checkbox"/> <sub>5</sub> |
| Never                                 | Rarely                                | Sometimes                             | Often                                 | Always                                |

**COPING WITH DISEASE/ HEALTH PERCEPTION**

**Note! The following sentences are statements. Please indicate whether you agree or disagree with these statements.**

19. Despite my C diff infection I can live a normal life.

<sub>1</sub>

Totally disagree

<sub>2</sub>

Mostly disagree

<sub>3</sub>

Don't know

<sub>4</sub>

Mostly agree

<sub>5</sub>

Totally agree



**CONTROL OF DISEASE**

20. I feel that I am not in control of my *C. diff* infection.

<sub>1</sub>

Totally disagree

<sub>2</sub>

Mostly disagree

<sub>3</sub>

Don't know

<sub>4</sub>

Mostly agree

<sub>5</sub>

Totally agree

21. I have no idea what I should do when I have my *C. Diff* infection?

<sub>1</sub>

Totally disagree

<sub>2</sub>

Mostly disagree

<sub>3</sub>

Don't know

<sub>4</sub>

Mostly agree

<sub>5</sub>

Totally agree

**IMPACT OF STRESS**

22. I believe that any stress can worsen my *C. diff* infection.

 <sub>1</sub>

Totally disagree

 <sub>2</sub>

Mostly disagree

 <sub>3</sub>

Don't know

 <sub>4</sub>

Mostly agree

 <sub>5</sub>

Totally agree

**DYSPHORIA**

23. I feel irritable because of my *C. diff* infection.

|                                       |                                       |                                       |                                       |                                       |
|---------------------------------------|---------------------------------------|---------------------------------------|---------------------------------------|---------------------------------------|
| <input type="checkbox"/> <sub>1</sub> | <input type="checkbox"/> <sub>2</sub> | <input type="checkbox"/> <sub>3</sub> | <input type="checkbox"/> <sub>4</sub> | <input type="checkbox"/> <sub>5</sub> |
| Totally disagree                      | Mostly disagree                       | Don't know                            | Mostly agree                          | Totally agree                         |

24. I feel isolated from others because of my *C. diff* infection.

|                                       |                                       |                                       |                                       |                                       |
|---------------------------------------|---------------------------------------|---------------------------------------|---------------------------------------|---------------------------------------|
| <input type="checkbox"/> <sub>1</sub> | <input type="checkbox"/> <sub>2</sub> | <input type="checkbox"/> <sub>3</sub> | <input type="checkbox"/> <sub>4</sub> | <input type="checkbox"/> <sub>5</sub> |
| Totally disagree                      | Mostly disagree                       | Don't know                            | Mostly agree                          | Totally agree                         |

25. I feel depressed because of my *C. diff* infection

|                                       |                                       |                                       |                                       |                                       |
|---------------------------------------|---------------------------------------|---------------------------------------|---------------------------------------|---------------------------------------|
| <input type="checkbox"/> <sub>1</sub> | <input type="checkbox"/> <sub>2</sub> | <input type="checkbox"/> <sub>3</sub> | <input type="checkbox"/> <sub>4</sub> | <input type="checkbox"/> <sub>5</sub> |
| Totally disagree                      | Mostly disagree                       | Don't know                            | Mostly agree                          | Totally agree                         |

26. I feel my life is less enjoyable because of my *C. diff* infection.

|                                       |                                       |                                       |                                       |                                       |
|---------------------------------------|---------------------------------------|---------------------------------------|---------------------------------------|---------------------------------------|
| <input type="checkbox"/> <sub>1</sub> | <input type="checkbox"/> <sub>2</sub> | <input type="checkbox"/> <sub>3</sub> | <input type="checkbox"/> <sub>4</sub> | <input type="checkbox"/> <sub>5</sub> |
| Totally disagree                      | Mostly disagree                       | Don't know                            | Mostly agree                          | Totally agree                         |

27. I worry about transmitting my *C. diff* infection to my family and/or friends.

|                                       |                                       |                                       |                                       |                                       |
|---------------------------------------|---------------------------------------|---------------------------------------|---------------------------------------|---------------------------------------|
| <input type="checkbox"/> <sub>1</sub> | <input type="checkbox"/> <sub>2</sub> | <input type="checkbox"/> <sub>3</sub> | <input type="checkbox"/> <sub>4</sub> | <input type="checkbox"/> <sub>5</sub> |
| Totally disagree                      | Mostly disagree                       | Don't know                            | Mostly agree                          | Totally agree                         |

28. I feel much stressed because of my *C. diff* infection.

|                                       |                                       |                                       |                                       |                                       |
|---------------------------------------|---------------------------------------|---------------------------------------|---------------------------------------|---------------------------------------|
| <input type="checkbox"/> <sub>1</sub> | <input type="checkbox"/> <sub>2</sub> | <input type="checkbox"/> <sub>3</sub> | <input type="checkbox"/> <sub>4</sub> | <input type="checkbox"/> <sub>5</sub> |
| Totally disagree                      | Mostly disagree                       | Don't know                            | Mostly agree                          | Totally agree                         |

**RELATIONSHIPS**

29. Because of my *C. diff* infection, I have difficulty being around people I do not know.

|                                       |                                       |                                       |                                       |                                       |
|---------------------------------------|---------------------------------------|---------------------------------------|---------------------------------------|---------------------------------------|
| <input type="checkbox"/> <sub>1</sub> | <input type="checkbox"/> <sub>2</sub> | <input type="checkbox"/> <sub>3</sub> | <input type="checkbox"/> <sub>4</sub> | <input type="checkbox"/> <sub>5</sub> |
| Totally disagree                      | Mostly disagree                       | Don't know                            | Mostly agree                          | Totally agree                         |

30. My *C. diff* infection is affecting my closest relationships.

|                                       |                                       |                                       |                                       |                                       |
|---------------------------------------|---------------------------------------|---------------------------------------|---------------------------------------|---------------------------------------|
| <input type="checkbox"/> <sub>1</sub> | <input type="checkbox"/> <sub>2</sub> | <input type="checkbox"/> <sub>3</sub> | <input type="checkbox"/> <sub>4</sub> | <input type="checkbox"/> <sub>5</sub> |
| Totally disagree                      | Mostly disagree                       | Don't know                            | Mostly agree                          | Totally agree                         |

**SOCIAL REACTION**

31. I feel like I irritate others because of my *C. diff* infection.

|                                       |                                       |                                       |                                       |                                       |
|---------------------------------------|---------------------------------------|---------------------------------------|---------------------------------------|---------------------------------------|
| <input type="checkbox"/> <sub>1</sub> | <input type="checkbox"/> <sub>2</sub> | <input type="checkbox"/> <sub>3</sub> | <input type="checkbox"/> <sub>4</sub> | <input type="checkbox"/> <sub>5</sub> |
| Totally disagree                      | Mostly disagree                       | Don't know                            | Mostly agree                          | Totally agree                         |

32. How would you rate your overall quality of life during the past week (that is, how have things been going for you)?

|                                       |                                       |                                       |                                       |                                       |
|---------------------------------------|---------------------------------------|---------------------------------------|---------------------------------------|---------------------------------------|
| <input type="checkbox"/> <sub>1</sub> | <input type="checkbox"/> <sub>2</sub> | <input type="checkbox"/> <sub>3</sub> | <input type="checkbox"/> <sub>4</sub> | <input type="checkbox"/> <sub>5</sub> |
| Very bad: could hardly be worse       | Pretty bad                            | Good and bad part about equals        | Pretty good                           | Very well: could hardly be better     |
